# Supplementary material for: Nutritional Status and Diet Style Affect Cognitive Function in Alcoholic Liver Disease
Source: Preprints.org preprint supplement (doi:10.20944/preprints202012.0087.v1), 2020-12-03
Supplement: Supplementary file 1 [file supplementary]

**Supplementary Table 1.** Neuropsychological tests

| **Variable** | **BMI <22**  **(n=17)** | **BMI ≥22**  **(n=26)** | **P- value** |
| --- | --- | --- | --- |
| **K-MMSE** |  |  |  |
| K-MMSE, orientation to time | 4.5 (0.7) | 4.5 (0.8) | 0.951 |
| K-MMSE, orientation to place | 4.9 (0.2) | 5.0 (0.2) | 0.898 |
| K-MMSE, attention and calculation | 3.7 (1.4) | 3.8 (1.3) | 0.784 |
| K-MMSE, recall | 2.0 (0.9) | 2.1 (0.8) | 0.464 |
| K-MMSE, drawing | 0.8 (0.4) | 0.8 (0.4) | 0.746 |
| K-MMSE, total score | 26.4 (2.9) | 27.1 (2.4) | 0.248 |
| **Language** |  |  |  |
| Calculation total score | 9.7 (2.5) | 10.2 (2.5) | 0.417 |
| **Memory** |  |  |  |
| SVLT recall total score | 18.2 (5.4) | 18.0 (4.4) | 0.884 |
| SVLT delayed recall | 6.4 (2.7) | 6.1 (2.5) | 0.575 |
| SVLT recognition score | 19.7 (4.1) | 18.0 (4.6) | 0.085 |
| RCFT immediate recall | 16.7 (9.5) | 16.7 (8.4) | 0.989 |
| RCFT delayed recall | 15.7 (9.1) | 17.4 (7.3) | 0.360 |
| RCFT recognition score | 18.8 (3.0) | 17.6 (3.8) | 0.127 |

K**-**MMSE**,** Korea-mini mental status examination; SVLT, Seoul-verbal learning test; RCFT, Ray-complex figure test;
